# Supplementary material
Source: publisher site journal article supplement (https://e-cmh.org/upload/media/cmh-2024-0038-Supplementary-Fig-1.pdf)
Supplement: Supplementary file 1 [file cmh-2024-0038-Supplementary-Fig-1.pdf]

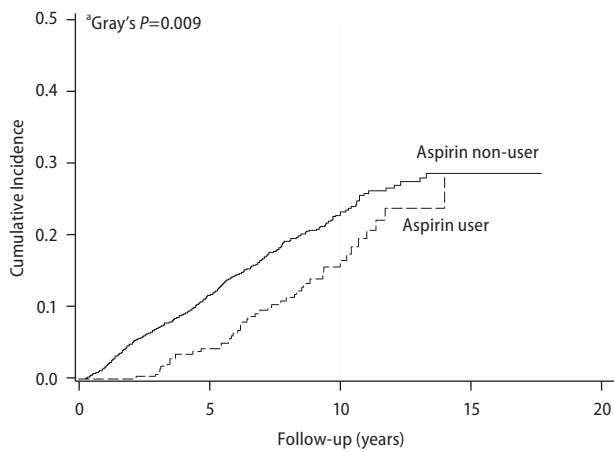

**A** All population

| Groups          |                          | BL    | 1Y    | 3Y    | 5Y    | 8Y   | 10Y  | <sup>b</sup> Crude SHR<br>(95% CI)<br><i>P</i> -value | <sup>b*</sup> Adjusted SHR<br>(95% CI)<br><i>P</i> -value |
|-----------------|--------------------------|-------|-------|-------|-------|------|------|-------------------------------------------------------|-----------------------------------------------------------|
| Aspirin non-use | No. at risk              | 2,490 | 2,416 | 2,189 | 1,667 | 779  | 293  | 1                                                     | 1                                                         |
|                 | Cumulative Incidence (%) |       | 1.6   | 7     | 11.6  | 19.1 | 23.1 |                                                       |                                                           |
| Aspirin use     | No. at risk              | 289   | 289   | 285   | 265   | 178  | 81   | 0.68 (0.50-0.91)<br><i>P</i> =0.009                   | 0.68 (0.50-0.91)<br><i>P</i> =0.009                       |
|                 | Cumulative Incidence (%) |       | 0     | 0.7   | 4.2   | 11.3 | 16.4 |                                                       |                                                           |

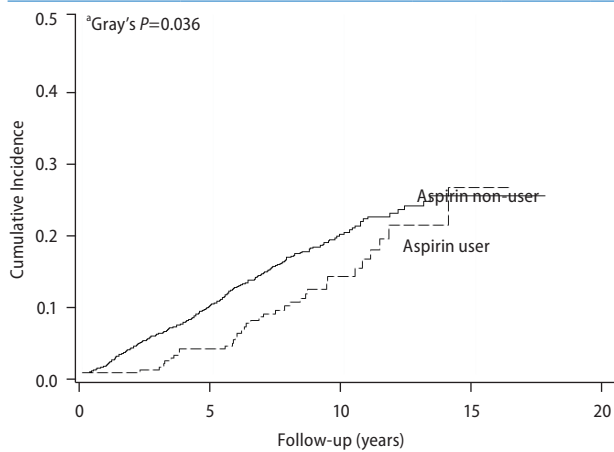

**B** Non-LC

| Groups          |                          | BL    | 1Y    | 3Y    | 5Y    | 8Y   | 10Y  | <sup>b</sup> Crude SHR<br>(95% CI)<br><i>P</i> -value | <sup>b*</sup> Adjusted SHR<br>(95% CI)<br><i>P</i> -value |
|-----------------|--------------------------|-------|-------|-------|-------|------|------|-------------------------------------------------------|-----------------------------------------------------------|
| Aspirin non-use | No. at risk              | 2,082 | 2,033 | 1,879 | 1,448 | 682  | 263  | 1                                                     | 1                                                         |
|                 | Cumulative Incidence (%) |       | 1.3   | 5.5   | 9.5   | 16.2 | 19.5 |                                                       |                                                           |
| Aspirin use     | No. at risk              | 246   | 246   | 242   | 227   | 157  | 76   | 0.69 (0.49-0.98)<br><i>P</i> =0.037                   | 0.76 (0.53-1.08)<br><i>P</i> =0.122                       |
|                 | Cumulative Incidence (%) |       | 0     | 0.8   | 3.3   | 9.8  | 13.4 |                                                       |                                                           |

**Supplementary Figure 1.** The impact of aspirin on the incidence of HCC among all population (A), the subgroups of non-LC (B) and LC (C). (A) <sup>a</sup>After considering death as a competing risk, a Kaplan–Meier plot was constructed using Gray’s cumulative incidence method. <sup>b</sup>All SHRs (95% CIs) and *P*-values were calculated using the Cox sub-distribution hazards method. \*Adjusted for age, sex, LC, HCV GT1, HCV RNA, DM/metformin and HLP/statin. DM, diabetes mellitus; HLP, hyperlipidemia; HCC, hepatocellular carcinoma; SHR, sub-distribution hazard ratio; LC, liver cirrhosis; GT, genotype. (B, C) <sup>a</sup>After considering death as a competing risk, a Kaplan–Meier plot was constructed using Gray’s cumulative incidence method. <sup>b</sup>All SHRs (95% CIs) and *P*-values were calculated using the Cox sub-distribution hazards method. \*Adjusted for age, sex, HCV GT1, HCV RNA, DM/metformin and HLP/statin. DM, diabetes mellitus; HLP, hyperlipidemia; HCC, hepatocellular carcinoma; SHR, sub-distribution hazard ratio; GT, genotype.

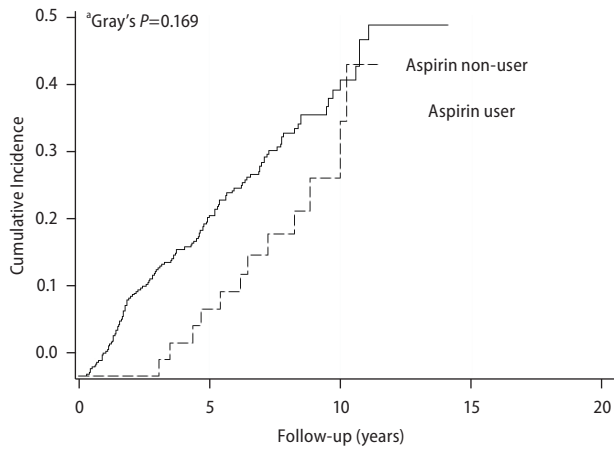

**C** LC

| Groups          |                          | BL  | 1Y  | 3Y   | 5Y   | 8Y   | 10Y  | <sup>b</sup> Crude SHR<br>(95% CI)<br><i>P</i> -value | <sup>b*</sup> Adjusted SHR<br>(95% CI)<br><i>P</i> -value |
|-----------------|--------------------------|-----|-----|------|------|------|------|-------------------------------------------------------|-----------------------------------------------------------|
| Aspirin non-use | No. at risk              | 408 | 383 | 311  | 220  | 98   | 30   | 1                                                     | 1                                                         |
|                 | Cumulative Incidence (%) |     | 3.2 | 14.7 | 22.3 | 33.8 | 41.1 |                                                       |                                                           |
| Aspirin use     | No. at risk              | 43  | 43  | 43   | 39   | 22   | 6    | 0.67 (0.39-1.16)<br><i>P</i> =0.153                   | 0.68 (0.39-1.18)<br><i>P</i> =0.167                       |
|                 | Cumulative Incidence (%) |     | 0   | 0    | 9.3  | 19.7 | 35.4 |                                                       |                                                           |

Supplementary Figure 1. Continued
